# Supplementary material for: Synthesis and solid state structure for a series of poly(1-pyrrolylmethyl)benzene derivatives. Control of the interplaying π–π and C–H⋯π interactions?
Source: Royal Society of Chemistry journal article supplement (doi:10.1039/b515930j), 2006-01-01
Supplement: b515930j.pdf [file b515930j.pdf]

# Synthesis and solid state structure for a series of poly(1-pyrrolylmethyl)benzene derivatives. Control of the interplaying $\pi$ - $\pi$ and C–H $\cdots\pi$ interactions?

José Giner Planas,<sup>a</sup> Carles Masalles,<sup>a</sup> Reijo Sillanpää,<sup>b</sup> R. Kivekäs,<sup>c</sup> F. Teixidor,<sup>a</sup> Clara Viñas<sup>a\*</sup>

<sup>a</sup> *Institut de Ciència de Materials de Barcelona, Campus U.A.B. 08193 Bellaterra, Spain. E-mail: clara@icmab.es*

<sup>b</sup> *Department of Chemistry. University of Jyväskylä. FIN-40531, Finland*

<sup>c</sup> *Department of Chemistry. P.O. Box 55, FIN-00014. University of Helsinki, Finland*

## Supplementary Material (ESI)

### A CSD search for intermolecular C–H $\cdots\pi$ (heterocycles) interactions.

A Cambridge Structural Database search for non-bonded contacts (Chart 1) was carried out using the program ConQuest (version 1.7).<sup>i</sup> The search criteria (CSD dated February 2005) were error and disorder free only structures (organic and organometallic) with *R* factors less than 0.1 (H normalized). Normalised structures were retrieved from the Cambridge Structural Database and analysed using VISTA (version 2.1).<sup>ii</sup> Of the 104 hits, 89 corresponded to C–H $\cdots\pi$ (N containing heterocycles).

**Chart 1.** Parameters used for the search

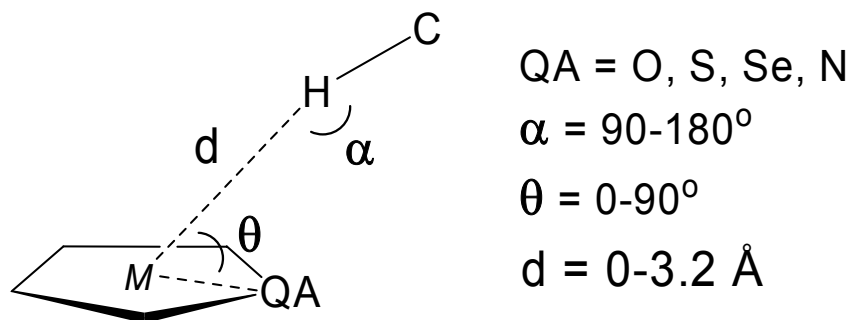

$M = \text{Centroid}$

**Figure I.** Scattergrams for the geometry of the retrieved intermolecular C-H $\cdots$  $\pi$ (heterocycle) interactions (see Chart 1 for nomenclature).

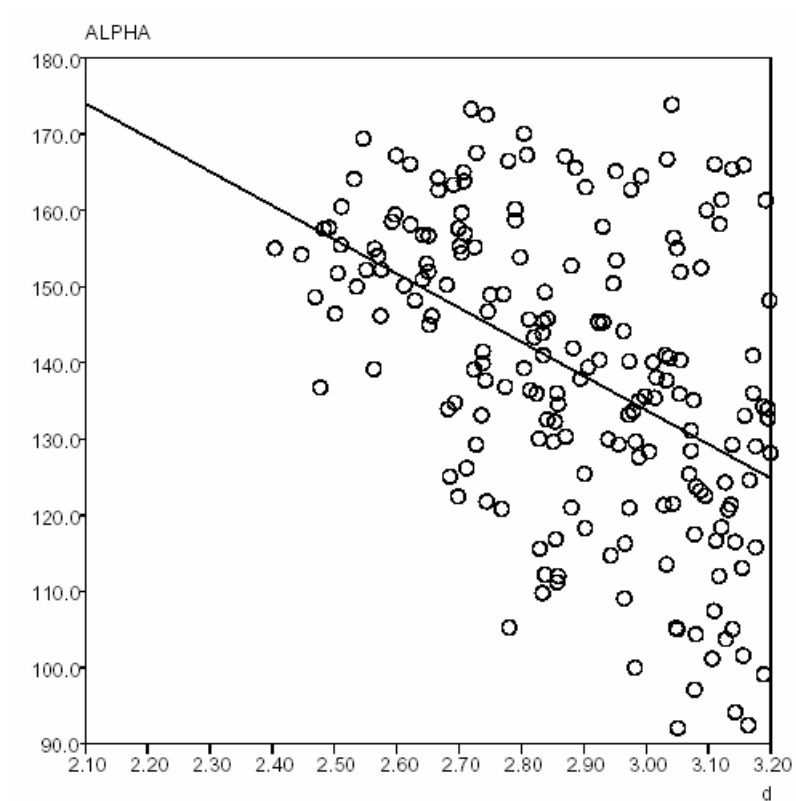

**Figure II.** Histogram of  $\theta$  (THETA) angles ( $^{\circ}$ ).

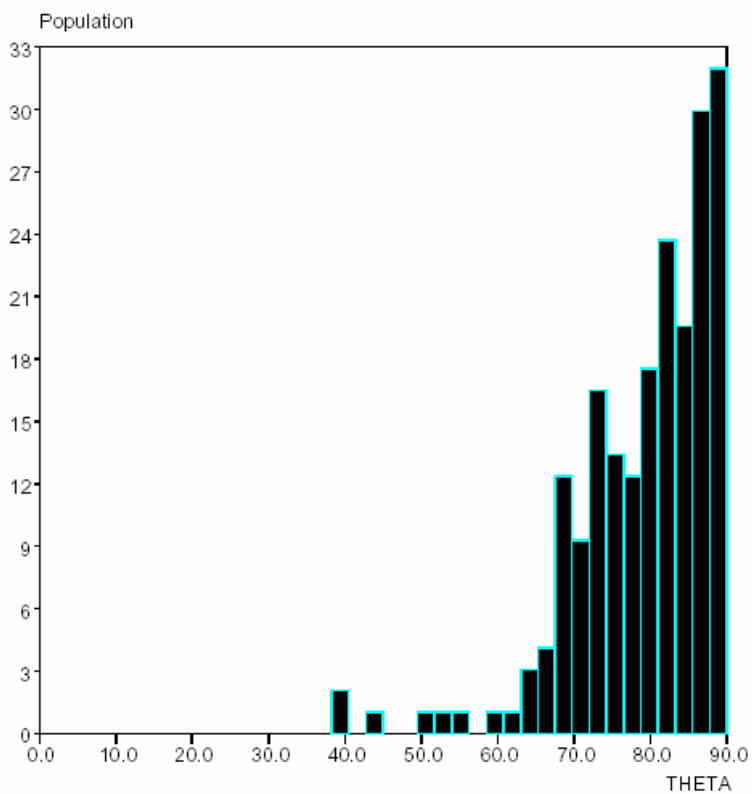

---

(i) Bruno, I. J.; Cole, J. C.; Edgington, P. R.; Kessler, M.; Macrae, C. F.; McCabe, P.; Pearson, J.; Taylor, R. *Acta Cryst.* **2002**, *B58*, 389.

(ii) CCDC (1994). Vista - A Program for the Analysis and Display of Data Retrieved from the CSD. Cambridge Crystallographic Data Centre, 12 Union Road, Cambridge, England.
